# Supplementary material
Source: Springer Nature journal article supplement (https://www.springermedizin.de/resource/supplementary/12967_2010_740_MOESM6_ESM.pdf/9577404)

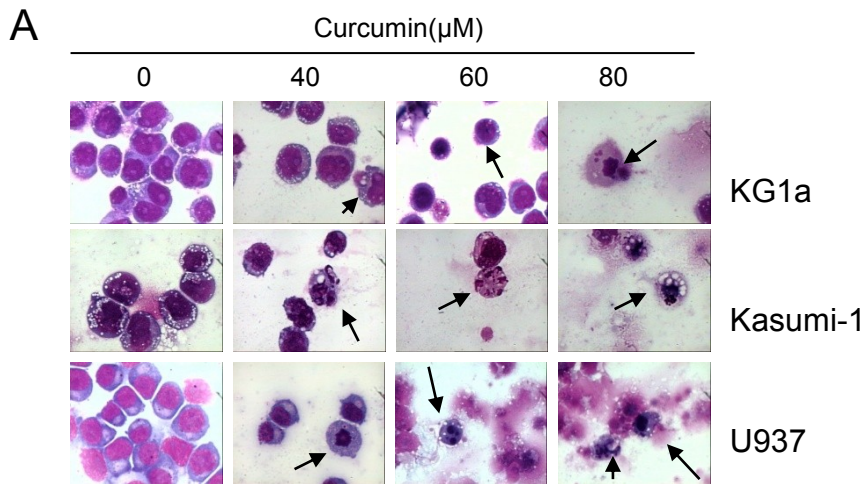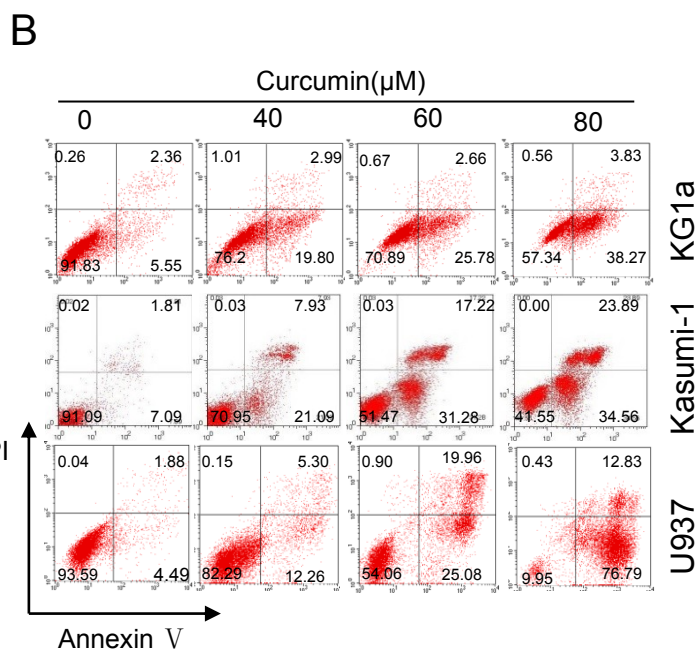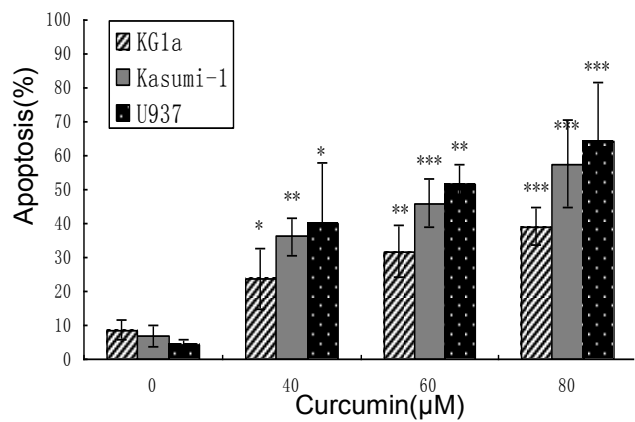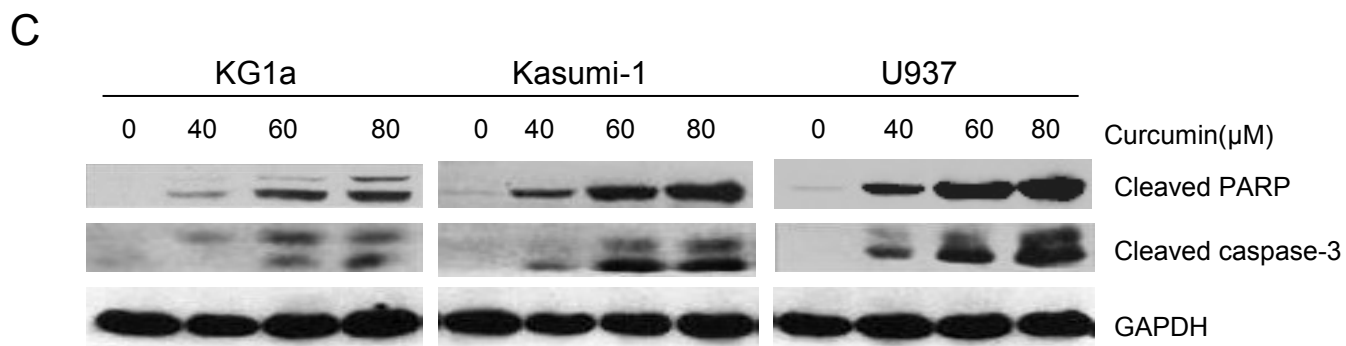

Supplement: MOESM6 [file 9577404]
